# Supplementary material for: Composted Sewage Sludge Sustains High Maize Productivity on an Infertile Oxisol in the Brazilian Cerrado
Source: MDPI journal article supplement (doi:10.3390/land11081246), 2022-08-05
Supplement: s1 [file s1]

**Supplementary Material Table S1.** Soil surface ( $A_p$ ; 0.0–0.2 m) main physical<sup>a</sup> and chemical<sup>b</sup> properties before the experiment started (mean  $\pm$  SE,  $n = 3$ )

| Attributes              | Units                  | Depth (m)  |       |      |
|-------------------------|------------------------|------------|-------|------|
|                         |                        | 0.0–0.2    |       |      |
| pH (CaCl <sub>2</sub> ) | -                      | 4.5        | $\pm$ | 0.1  |
| Sand                    | g kg <sup>-1</sup>     | 550        | $\pm$ | 13   |
| Silt                    | g kg <sup>-1</sup>     | 80         | $\pm$ | 3    |
| Clay                    | g kg <sup>-1</sup>     | 370        | $\pm$ | 19   |
| Texture                 |                        | Sandy-clay |       |      |
| SOM                     | g kg <sup>-1</sup>     | 19.0       | $\pm$ | 1.2  |
| P                       | mg kg <sup>-1</sup>    | 16.6       | $\pm$ | 0.6  |
| K <sup>+</sup>          | mmolc kg <sup>-1</sup> | 1.7        | $\pm$ | 0.2  |
| Ca <sup>2+</sup>        | mmolc kg <sup>-1</sup> | 13.0       | $\pm$ | 0.6  |
| Mg <sup>2+</sup>        | mmolc kg <sup>-1</sup> | 12.0       | $\pm$ | 1.6  |
| CEC                     | mmolc kg <sup>-1</sup> | 63.7       | $\pm$ | 0.9  |
| B                       | mg kg <sup>-1</sup>    | 0.22       | $\pm$ | 0.04 |
| Cu                      | mg kg <sup>-1</sup>    | 1.8        | $\pm$ | 0.1  |
| Fe                      | mg kg <sup>-1</sup>    | 15.0       | $\pm$ | 0.6  |
| Mn                      | mg kg <sup>-1</sup>    | 18.8       | $\pm$ | 0.6  |
| Zn                      | mg kg <sup>-1</sup>    | 0.6        | $\pm$ | 0.1  |

<sup>a</sup> Teixeira [20]. <sup>b</sup> Raji et al. [21]. SOM: soil organic matter. CEC: Cation-exchange capacity.

**Supplementary Material Table S2.** Equation for micronutrient behavior in soils; function was obtained considering soil elements concentration after 2 years of maize cultivation vs. CSS applied rates.

| Nutrient | Equation (WA)                          | R <sup>2</sup> | Equation (BR)                          |  | R <sup>2</sup> |
|----------|----------------------------------------|----------------|----------------------------------------|--|----------------|
|          |                                        |                | 2017/18                                |  |                |
|          |                                        |                |                                        |  |                |
| B        | $\hat{y} = 0.282 + 0.007x$             | 0.74*          | $\hat{y} = 0.235 + 0.010x$             |  | 0.55**         |
| Cu       | $\hat{y} = 2.3^{NS}$                   | --             | $\hat{y} = 2.3^{NS}$                   |  | --             |
| Fe       | $\hat{y} = 35.325 - 3.630x + 0.220x^2$ | 0.71**         | $\hat{y} = 23^{NS}$                    |  | --             |
| Mn       | $\hat{y} = 20^{NS}$                    | --             | $\hat{y} = 22^{NS}$                    |  | --             |
| Zn       | $\hat{y} = 0.992 + 0.030x$             | 0.26*          | $\hat{y} = 1.2^{NS}$                   |  | --             |
| 2018/19  |                                        |                |                                        |  |                |
| B        | $\hat{y} = 0.030x + 0.078$             | 0.79**         | $\hat{y} = 0.0001 + 0.076x - 0.004x^2$ |  | 0.99**         |
| Cu       | $\hat{y} = 1.5^{NS}$                   | --             | $\hat{y} = 1.4^{NS}$                   |  | --             |
| Fe       | $\hat{y} = 17.0^{NS}$                  | --             | $\hat{y} = 13.6^{NS}$                  |  | --             |
| Mn       | $\hat{y} = 15.580 - 0.412x$            | 0.96**         | $\hat{y} = 11.9^{NS}$                  |  | --             |
| Zn       | $\hat{y} = 0.060 + 0.226x$             | 0.90**         | $\hat{y} = 1.5^{NS}$                   |  | --             |

\*, \*\* for  $p \leq 0.05$ ,  $\leq 0.01$ , respectively; <sup>NS</sup> = not significant; WA = whole area; BR = between rows.

**Supplementary Material Table S3.** Equation for investigated micronutrient behavior in leaves; function was obtained considering leaf element concentration after 2 years of maize cultivation vs. CSS applied rates.

| Nutrient       | Equation (WA)                            | R <sup>2</sup> | Equation (BR)                            | R <sup>2</sup> |
|----------------|------------------------------------------|----------------|------------------------------------------|----------------|
| <i>2017/18</i> |                                          |                |                                          |                |
| <b>B</b>       | $\hat{y} = 15^{\text{NS}}$               | --             | $\hat{y} = 33.310 - 4.519x - 0.254x^2$   | 0.99**         |
| <b>Cu</b>      | $\hat{y} = 28.950 - 1.130x$              | 0.95**         | $\hat{y} = 52.300 - 8.720x - 0.480x^2$   | 0.99**         |
| <b>Fe</b>      | $\hat{y} = 1.260x^2 - 23.030x + 208.825$ | 0.47**         | $\hat{y} = 117^{\text{NS}}$              | --             |
| <b>Mn</b>      | $\hat{y} = 70^{\text{NS}}$               | --             | $\hat{y} = 96.750 - 8.150x + 0.460x^2$   | 0.42**         |
| <b>Zn</b>      | $\hat{y} = 40^{\text{NS}}$               | --             | $\hat{y} = 34.625 + 0.500x$              | 0.47**         |
| <i>2018/19</i> |                                          |                |                                          |                |
| <b>B</b>       | $\hat{y} = 5^{\text{NS}}$                | --             | $\hat{y} = 27.547 - 4.119x + 0.194x^2$   | 0.54**         |
| <b>Cu</b>      | $\hat{y} = 7^{\text{NS}}$                | --             | $\hat{y} = 3.943 - 8.759x - 0.215x^2$    | 0.56**         |
| <b>Fe</b>      | $\hat{y} = 98^{\text{NS}}$               | --             | $\hat{y} = 33.785 + 14.856x - 0.760x^2$  | 0.90**         |
| <b>Mn</b>      | $\hat{y} = 28^{\text{NS}}$               | --             | $\hat{y} = -28.455 + 13.702x - 0.752x^2$ | 0.92**         |
| <b>Zn</b>      | $\hat{y} = 22.182 + 0.562x$              | 0.74*          | $\hat{y} = 27^{\text{NS}}$               | --             |

\*, \*\* for  $p \leq 0.05$ ,  $\leq 0.01$ , respectively; <sup>NS</sup> = not significant; WA = whole area; BR = between rows.

**Supplementary Material Table S4.** Equation for investigated plant parameters; function was obtained considering investigated plant parameters after 2 years of maize cultivation vs. CSS applied rates.

| Parameter    | Equation (WA)                          | R <sup>2</sup> | Equation (BR)                | R <sup>2</sup> |
|--------------|----------------------------------------|----------------|------------------------------|----------------|
| <i>2018</i>  |                                        |                |                              |                |
| <b>PH</b>    | $\hat{y} = 211^{\text{NS}}$            | --             | $\hat{y} = 209^{\text{NS}}$  | --             |
| <b>HEI</b>   | $\hat{y} = 129^{\text{NS}}$            | --             | $\hat{y} = 129^{\text{NS}}$  | --             |
| <b>SD</b>    | $\hat{y} = 2.4^{\text{NS}}$            | --             | $\hat{y} = 2.4^{\text{NS}}$  | --             |
| <b>NRE</b>   | $\hat{y} = 13.500 + 0.825x - 0.042x^2$ | 0.91**         | $\hat{y} = 18^{\text{NS}}$   | --             |
| <b>NGE</b>   | $\hat{y} = 612^{\text{NS}}$            | --             | $\hat{y} = 625^{\text{NS}}$  | --             |
| <b>SW</b>    | $\hat{y} = 270^{\text{NS}}$            | --             | $\hat{y} = 268^{\text{NS}}$  | --             |
| <b>Yield</b> | $\hat{y} = 5639.015 + 197.044x$        | 0.84**         | $\hat{y} = 7539^{\text{NS}}$ | --             |
| <i>2019</i>  |                                        |                |                              |                |
| <b>PH</b>    | $\hat{y} = 225^{\text{NS}}$            | --             | $\hat{y} = 227^{\text{NS}}$  | --             |
| <b>HEI</b>   | $\hat{y} = 137^{\text{NS}}$            | --             | $\hat{y} = 138^{\text{NS}}$  | --             |
| <b>SD</b>    | $\hat{y} = 21.3^{\text{NS}}$           | --             | $\hat{y} = 20.7^{\text{NS}}$ | --             |
| <b>NRE</b>   | $\hat{y} = 17^{\text{NS}}$             | --             | $\hat{y} = 17^{\text{NS}}$   | --             |
| <b>NGE</b>   | $\hat{y} = 543^{\text{NS}}$            | --             | $\hat{y} = 552^{\text{NS}}$  | --             |
| <b>SW</b>    | $\hat{y} = 291^{\text{NS}}$            | --             | $\hat{y} = 292^{\text{NS}}$  | --             |
| <b>Yield</b> | $\hat{y} = 9566^{\text{NS}}$           | --             | $\hat{y} = 9767^{\text{NS}}$ | --             |

\*, \*\* for  $p \leq 0.05$ ,  $\leq 0.01$ , respectively; <sup>NS</sup> = not significant; WA = whole area; BR = between rows. PH = plant height; HEI = height from ear insertion; SD = stem diameter; NRE = number of rows per ear; NGE = number of grains per ear; SW = 1,000 seed weight.
